# Supplementary material for: Antimicrobial and Antioxidant Secondary Metabolites from Trifolium baccarinii Chiov. (Fabaceae) and Their Mechanisms of Antibacterial Action
Source: Hindawi journal article supplement (doi:10.1155/2021/3099428), 2021-01-01
Supplement: f1 [file 3099428.f1.pdf]

**Antimicrobial and antioxidant secondary metabolites from  
*Trifolium baccarinii* Chiov. (Fabaceae) and their mechanisms of  
antibacterial action**

Léonel Donald Tsamo Feugap<sup>1</sup>, Jean-De-Dieu Tamokou<sup>2,\*</sup>, Irene Chinda Kengne<sup>2</sup>, Claudia Darille Jouogo Ngnokam<sup>1</sup>, Mahamat Djamalladine Djamalladine<sup>1</sup>, Laurence Voutquenne-Nazabadioko<sup>3</sup> and David Ngnokam<sup>1</sup>

*Supplementary Material*

## **FIGURE captions**

|                                                                             |    |
|-----------------------------------------------------------------------------|----|
| Figure S1: $^1\text{H}$ NMR Spectrum of Compound <b>1</b>                   | 4  |
| FIGURE S2: $^{13}\text{C}$ NMR Spectrum of Compound <b>1</b>                | 4  |
| FIGURE S3: $^1\text{H}$ -NMR Spectrum of Compound <b>2</b>                  | 4  |
| FIGURE S4: $^{13}\text{C}$ -NMR Spectrum of Compound <b>2</b>               | 5  |
| FIGURE S5: HSQC Spectrum of Compound <b>2</b>                               | 5  |
| FIGURE S6 : $^1\text{H}$ - $^1\text{H}$ COSY Spectrum of Compound <b>2</b>  | 6  |
| FIGURE S7: HMBC Spectrum of Compound <b>2</b>                               | 6  |
| FIGURE S8 : $^1\text{H}$ -NMR Spectrum of Compound <b>3</b>                 | 7  |
| FIGURE S9 : $^{13}\text{C}$ -NMR Spectrum of Compound <b>3</b>              | 7  |
| FIGURE S10 : HSQC Spectrum of Compound <b>3</b>                             | 8  |
| FIGURE S11 : $^1\text{H}$ -NMR Spectrum of Compound <b>4</b>                | 8  |
| FIGURE S12 : $^{13}\text{C}$ -NMR Spectrum of Compound <b>4</b>             | 9  |
| FIGURE S13 : HSQC Spectrum of Compound <b>4</b>                             | 9  |
| FIGURE S14 : $^1\text{H}$ - $^1\text{H}$ COSY Spectrum of Compound <b>4</b> | 10 |
| FIGURE S15 : HMBC Spectrum of Compound <b>4</b>                             | 10 |
| FIGURE S16 : $^1\text{H}$ -NMR Spectrum of Compound <b>5</b>                | 11 |
| FIGURE S17 : $^{13}\text{C}$ -NMR Spectrum of Compound <b>5</b>             | 11 |
| FIGURE S18 : HSQC Spectrum of Compound <b>5</b>                             | 12 |
| FIGURE S19 : $^1\text{H}$ - $^1\text{H}$ COSY Spectrum of Compound <b>5</b> | 12 |
| FIGURE S20 : HMBC Spectrum of Compound <b>5</b>                             | 13 |
| FIGURE S21 : $^1\text{H}$ -NMR Spectrum of Compound <b>6</b>                | 13 |
| FIGURE S22 : $^{13}\text{C}$ -NMR Spectrum of Compound <b>6</b>             | 13 |
| FIGURE S23 : HSQC Spectrum of Compound <b>6</b>                             | 14 |
| FIGURE S24 : $^1\text{H}$ - $^1\text{H}$ COSY Spectrum of Compound <b>6</b> | 14 |
| FIGURE S25 : HMBC Spectrum of Compound <b>6</b>                             | 15 |
| FIGURE S26 : $^1\text{H}$ -NMR Spectrum of Compound <b>7</b>                | 15 |
| FIGURE S27 : $^{13}\text{C}$ -NMR Spectrum of Compound <b>7</b>             | 16 |
| FIGURE S28 : HSQC Spectrum of Compound <b>7</b>                             | 16 |
| FIGURE S29 : $^1\text{H}$ - $^1\text{H}$ COSY Spectrum of Compound <b>7</b> | 17 |
| FIGURE S30 : HMBC Spectrum of Compound <b>7</b>                             | 17 |

|                                                                              |    |
|------------------------------------------------------------------------------|----|
| FIGURE S31 : $^1\text{H}$ -NMR Spectrum of Compound <b>8</b>                 | 18 |
| FIGURE S32 : $^{13}\text{C}$ -NMR Spectrum of Compound <b>8</b>              | 18 |
| FIGURE S33 : HSQC Spectrum of Compound <b>8</b>                              | 19 |
| FIGURE S34 : $^1\text{H}$ - $^1\text{H}$ COSY Spectrum of Compound <b>8</b>  | 19 |
| FIGURE S35 : HMBC Spectrum of Compound <b>8</b>                              | 20 |
| FIGURE S36 : $^1\text{H}$ -NMR Spectrum of Compound <b>9</b>                 | 20 |
| FIGURE S37 : $^{13}\text{C}$ -NMR Spectrum of Compound <b>9</b>              | 21 |
| FIGURE S38 : HSQC Spectrum of Compound <b>9</b>                              | 21 |
| FIGURE S39 : $^1\text{H}$ -NMR Spectrum of Compound <b>10</b>                | 22 |
| FIGURE S40 : $^{13}\text{C}$ -NMR Spectrum of Compound <b>10</b>             | 22 |
| FIGURE S41 : HSQC Spectrum of Compound <b>10</b>                             | 23 |
| FIGURE S42 : $^1\text{H}$ - $^1\text{H}$ COSY Spectrum of Compound <b>10</b> | 23 |
| FIGURE S43 : HMBC Spectrum of Compound <b>10</b>                             | 24 |

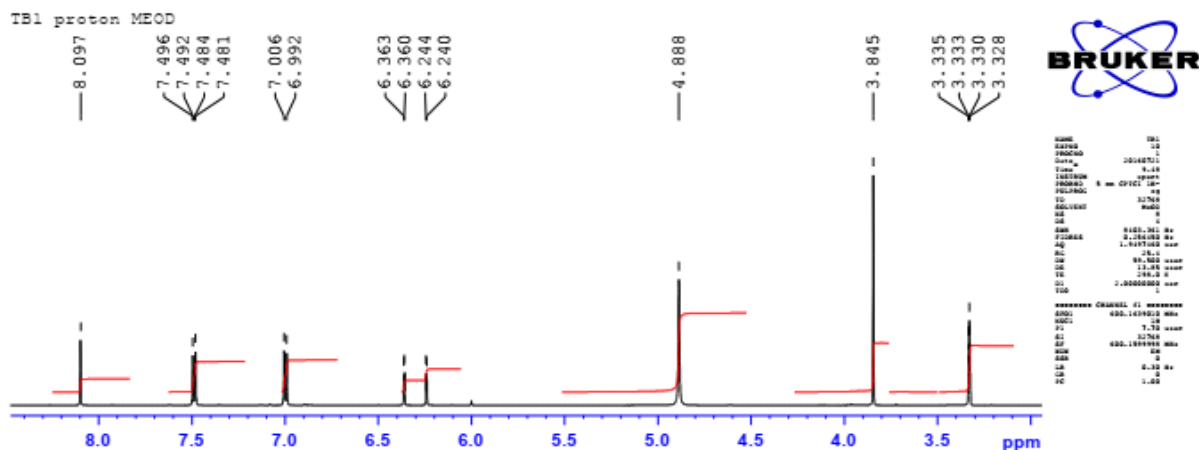

FIGURE S1:  $^1\text{H}$  NMR Spectrum of Compound 1

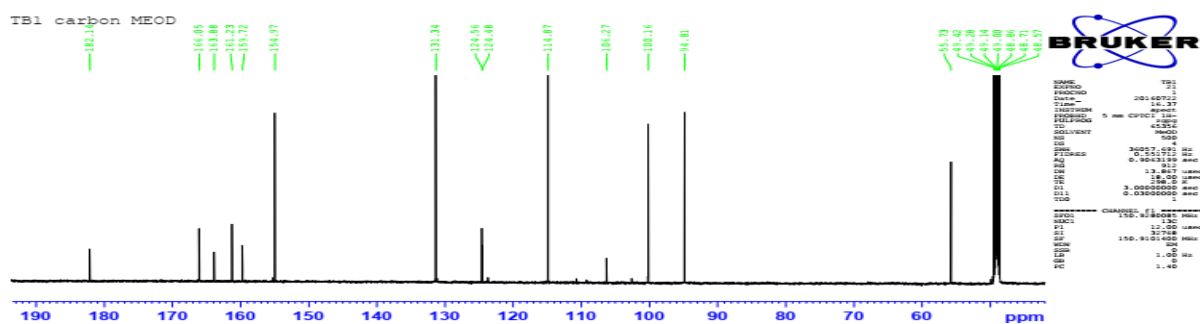

FIGURE S2.  $^{13}\text{C}$  NMR Spectrum of Compound 1

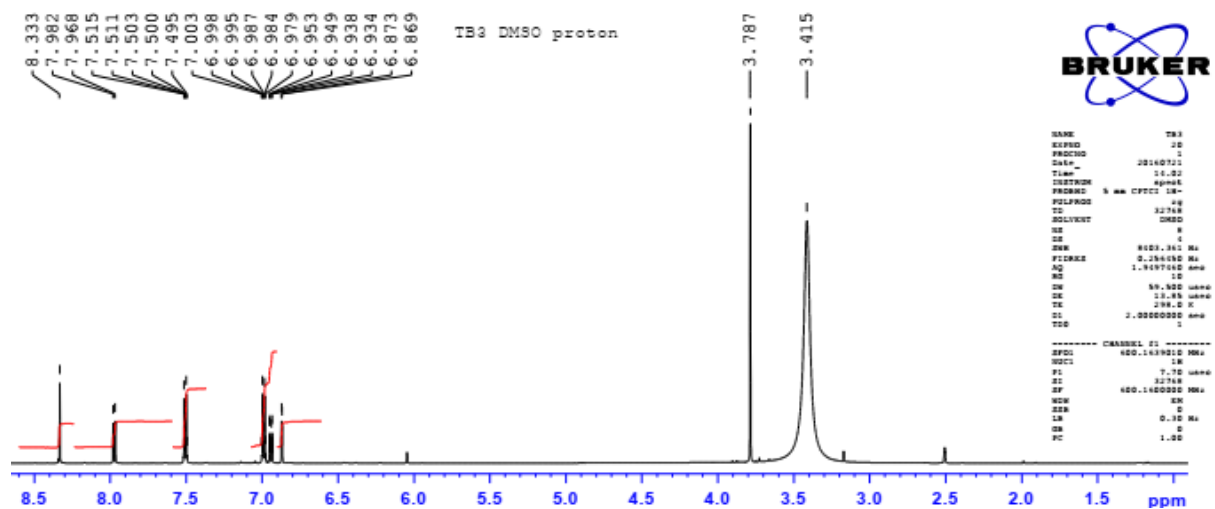

FIGURE S3:  $^1\text{H}$ -NMR Spectrum of Compound 2

TB3 DMSO carbon

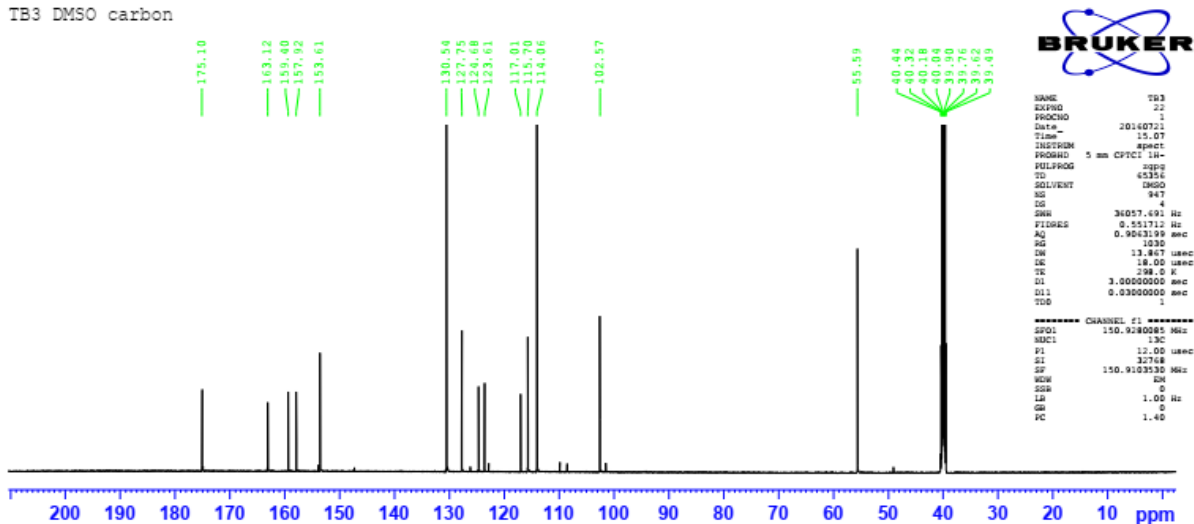

FIGURE S4:  $^{13}\text{C}$ -NMR Spectrum of Compound 2

TB3 Hsqc

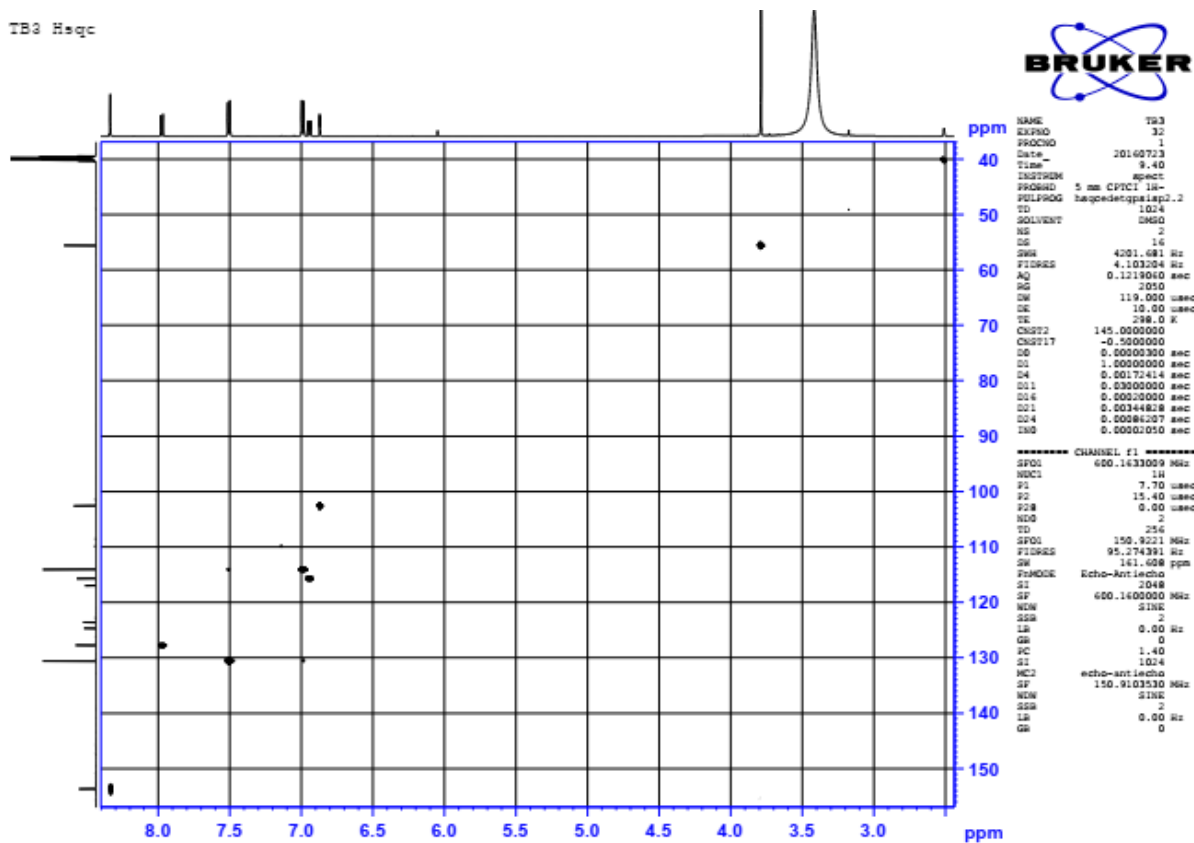

FIGURE S5: HSQC Spectrum of Compound 2

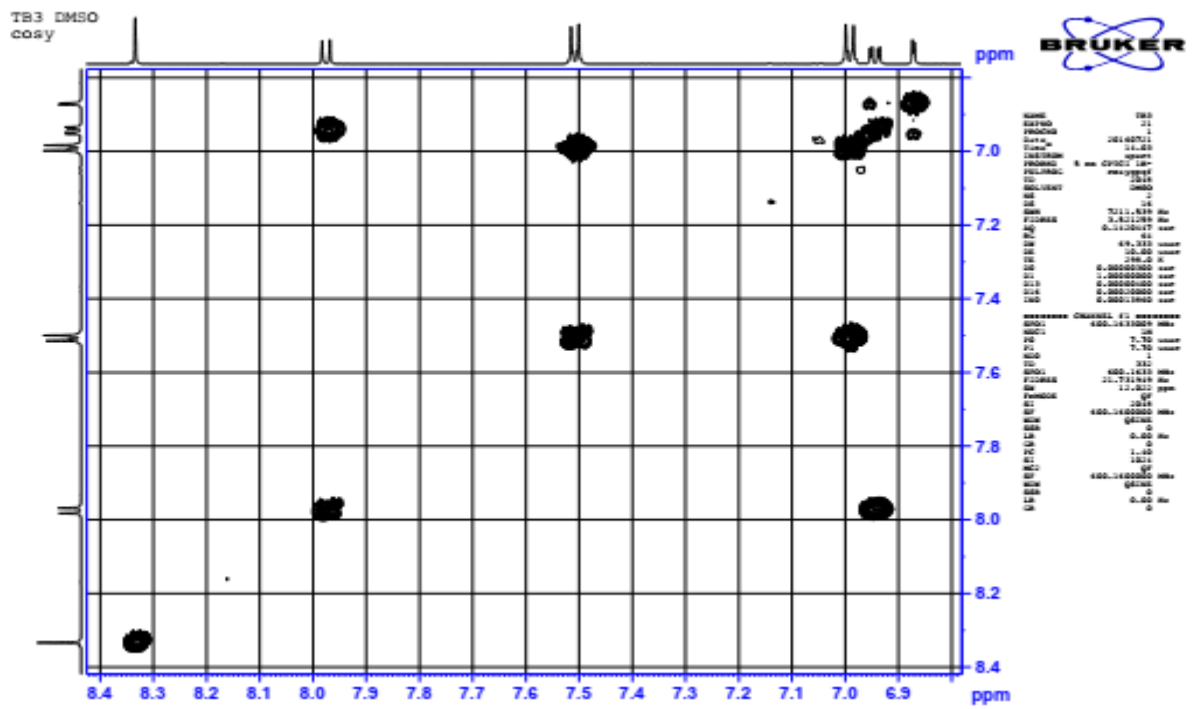

FIGURE S6 : <sup>1</sup>H-<sup>1</sup>H COSY Spectrum of Compound 2

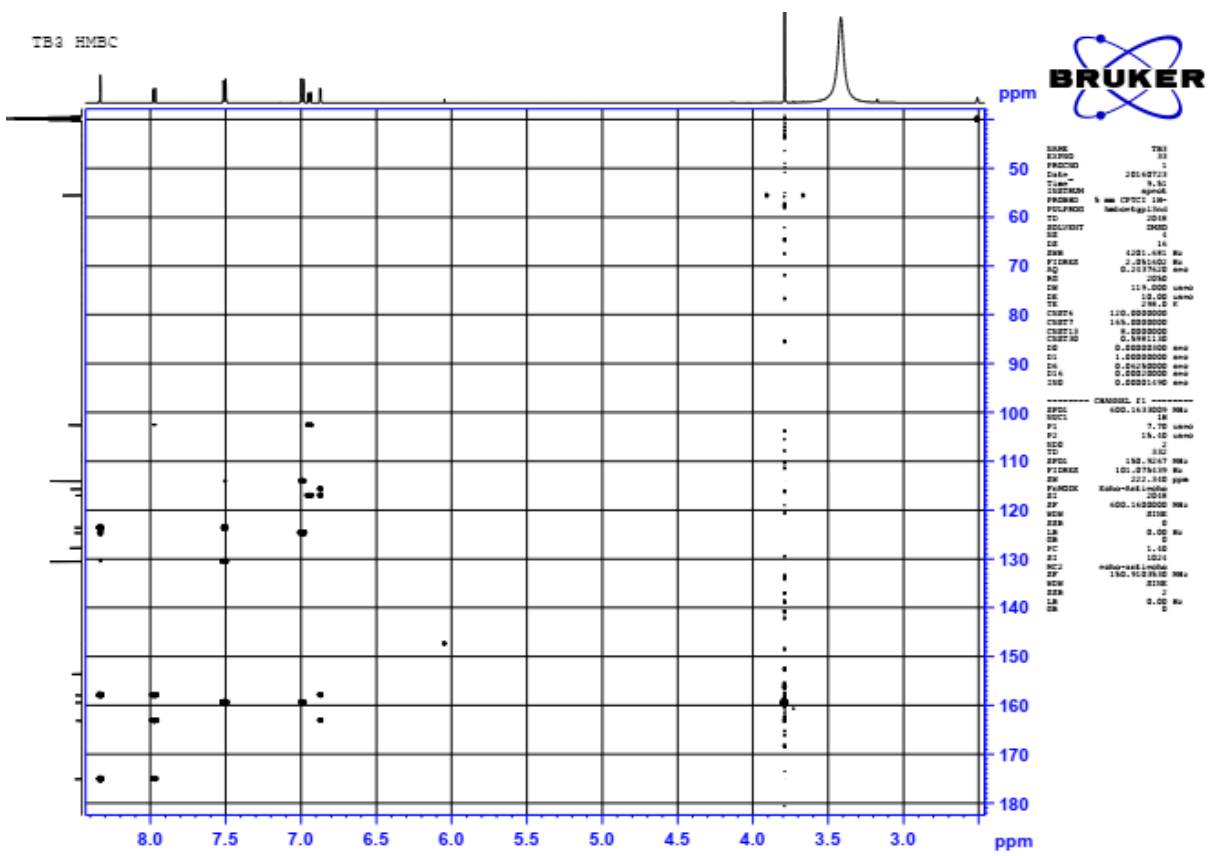

FIGURE S7: HMBC Spectrum of Compound 2

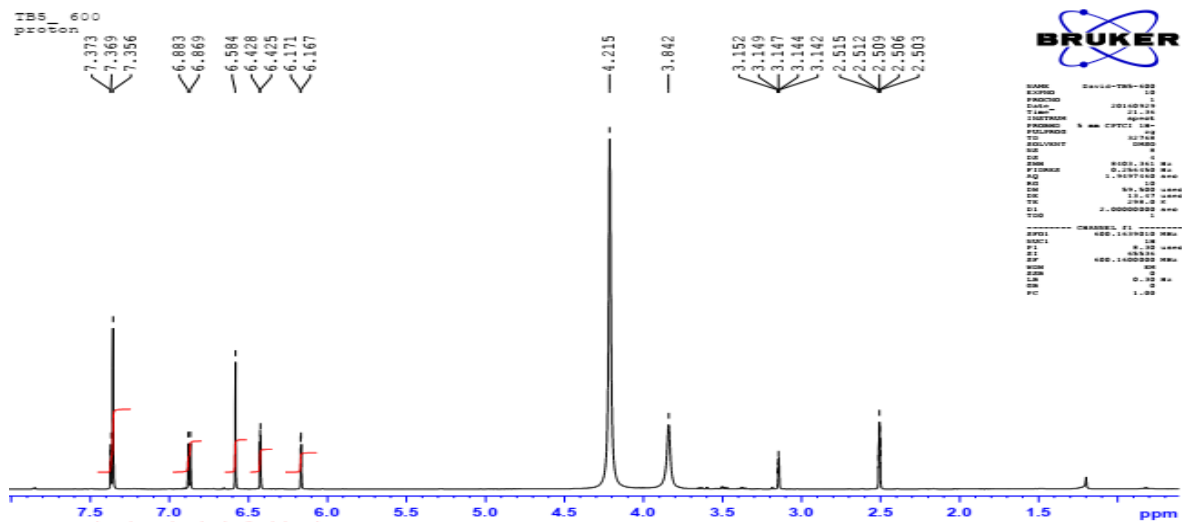

FIGURE S8 :  $^1\text{H}$ -NMR Spectrum of Compound 3

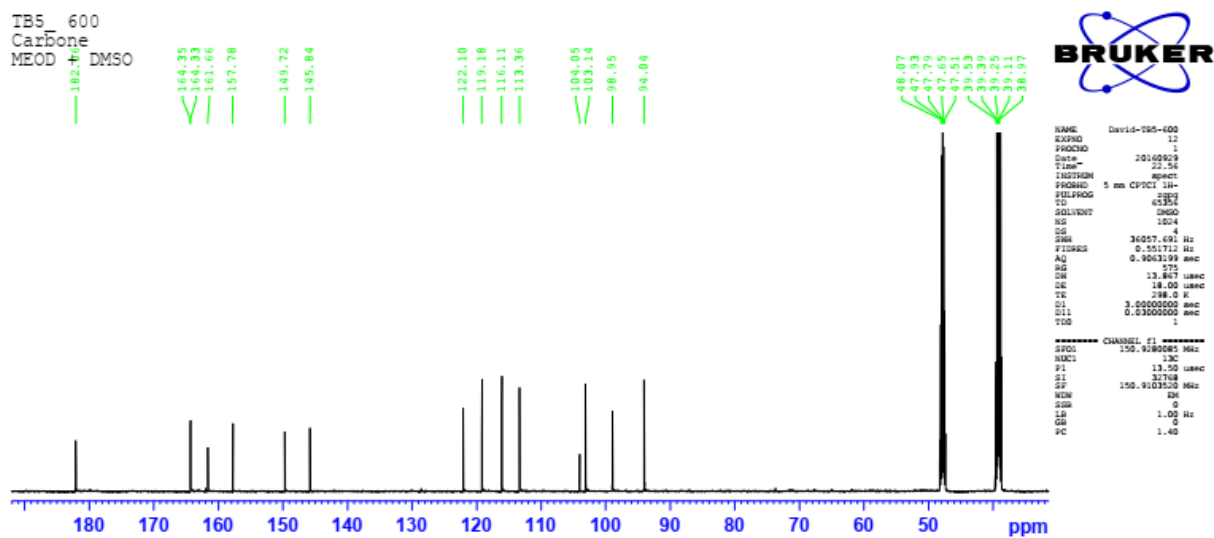

FIGURE S9 :  $^{13}\text{C}$ -NMR Spectrum of Compound 3





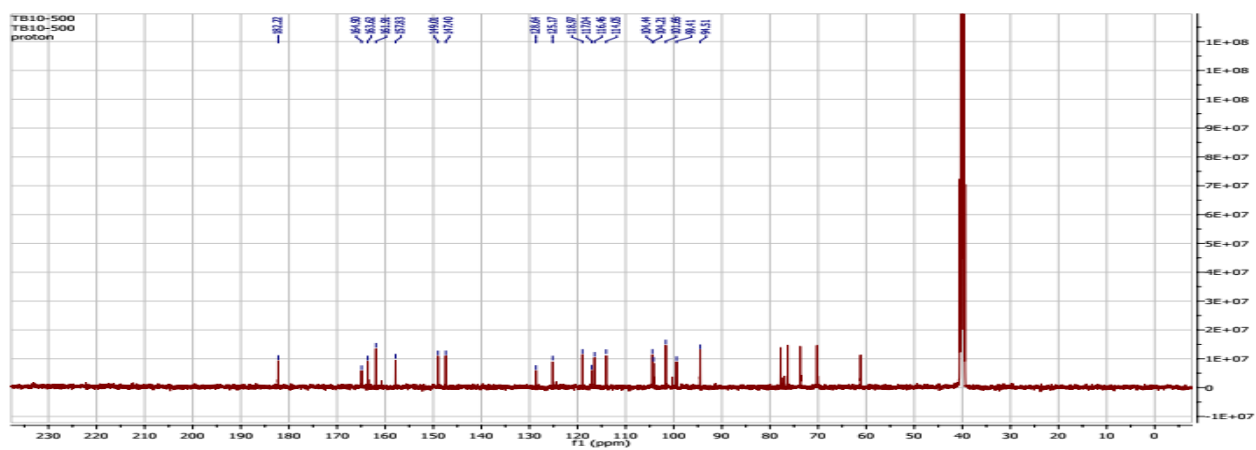

FIGURE S12 :  $^{13}\text{C}$ -NMR Spectrum of Compound 4

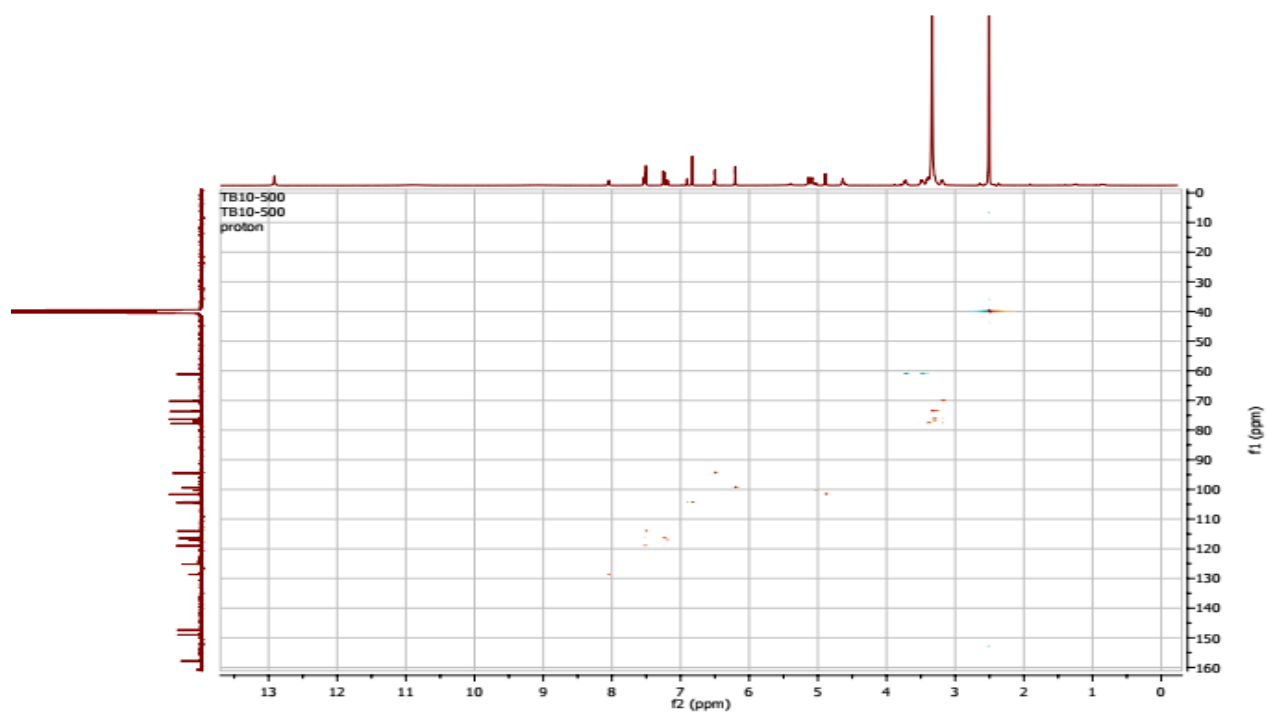

FIGURE S13 : HSQC Spectrum of Compound 4

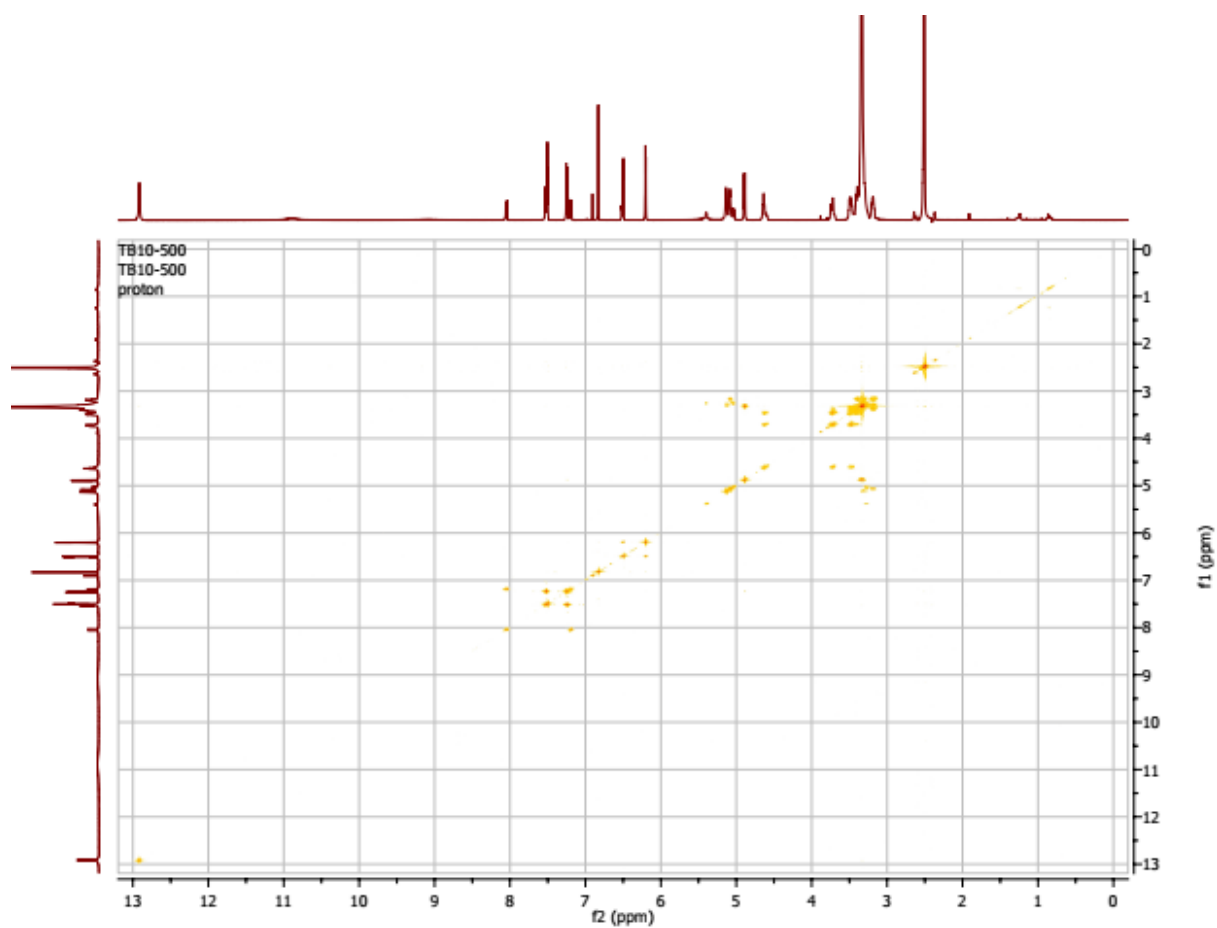

FIGURE S14 :  $^1\text{H}$ - $^1\text{H}$  COSY Spectrum of Compound 4

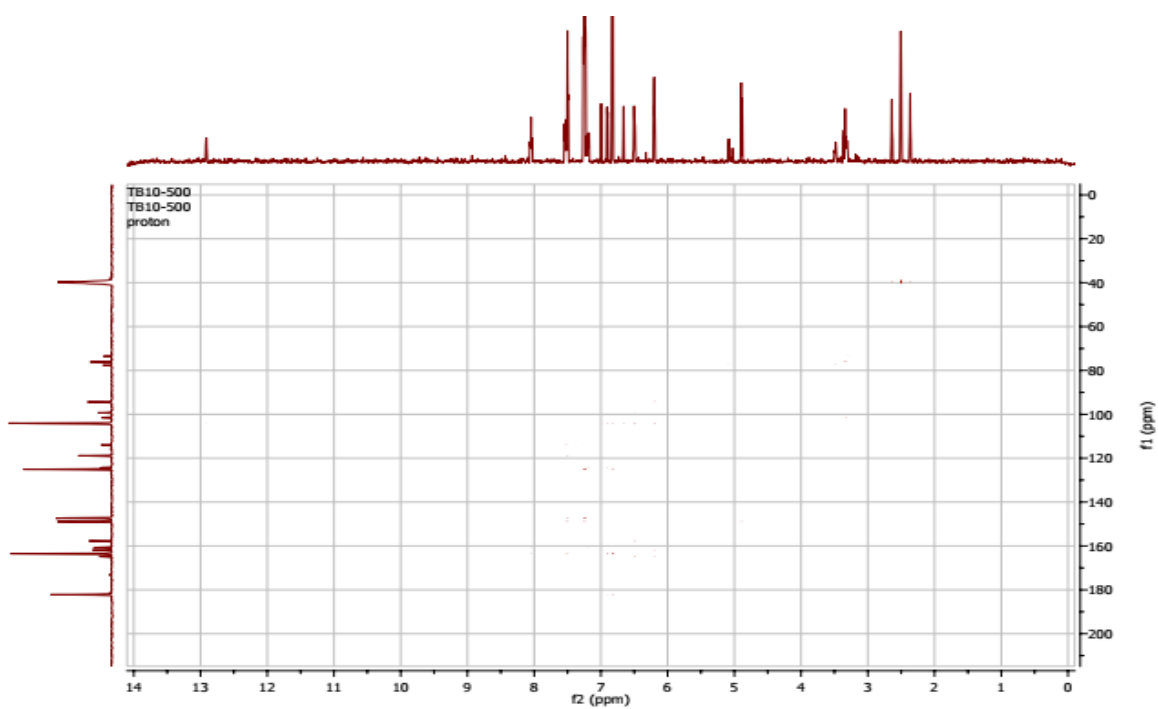

FIGURE S15 : HMBC Spectrum of Compound 4

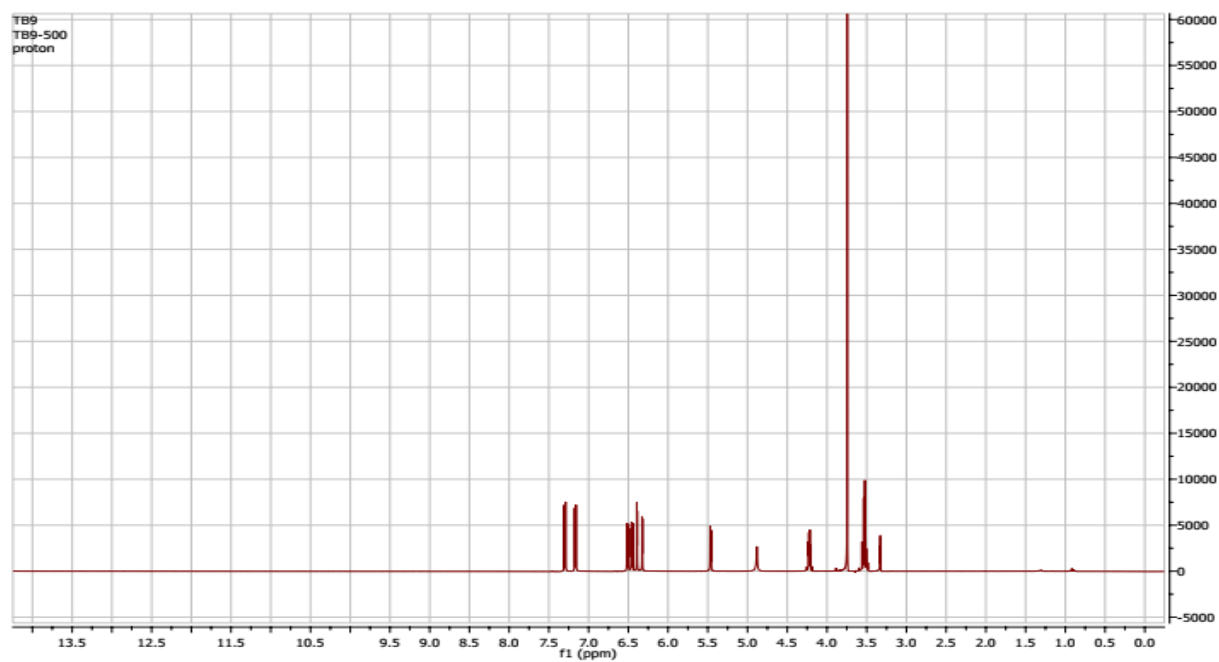

FIGURE S16 :  $^1\text{H-NMR}$  Spectrum of Compound 5

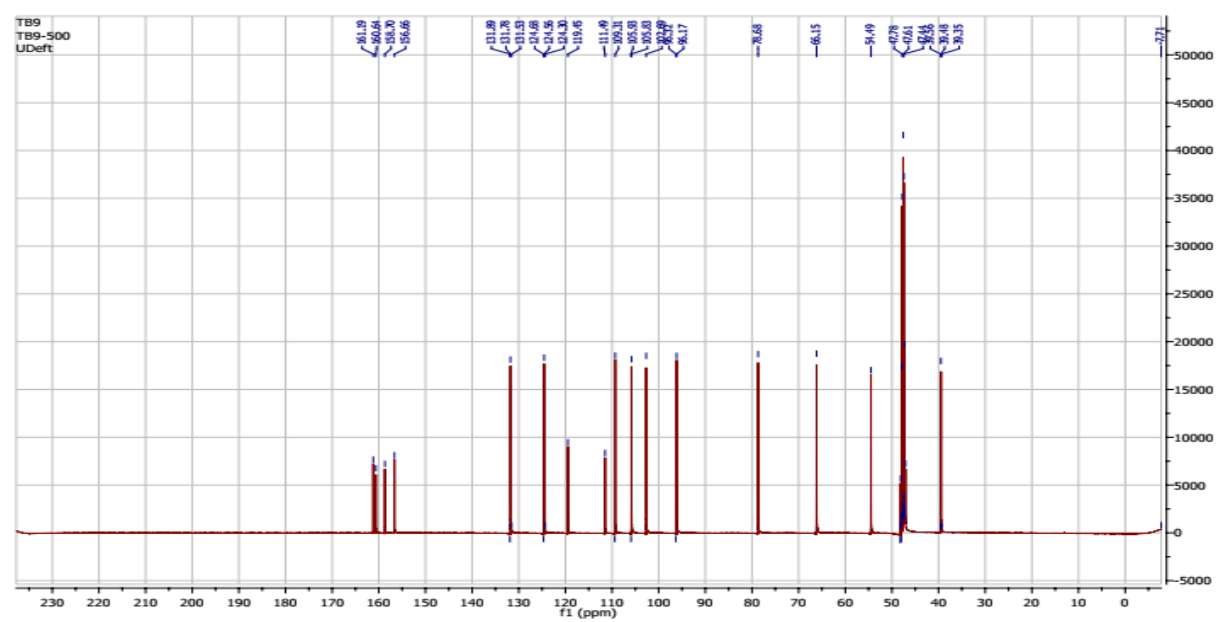

FIGURE S17 :  $^{13}\text{C-NMR}$  Spectrum of Compound 5

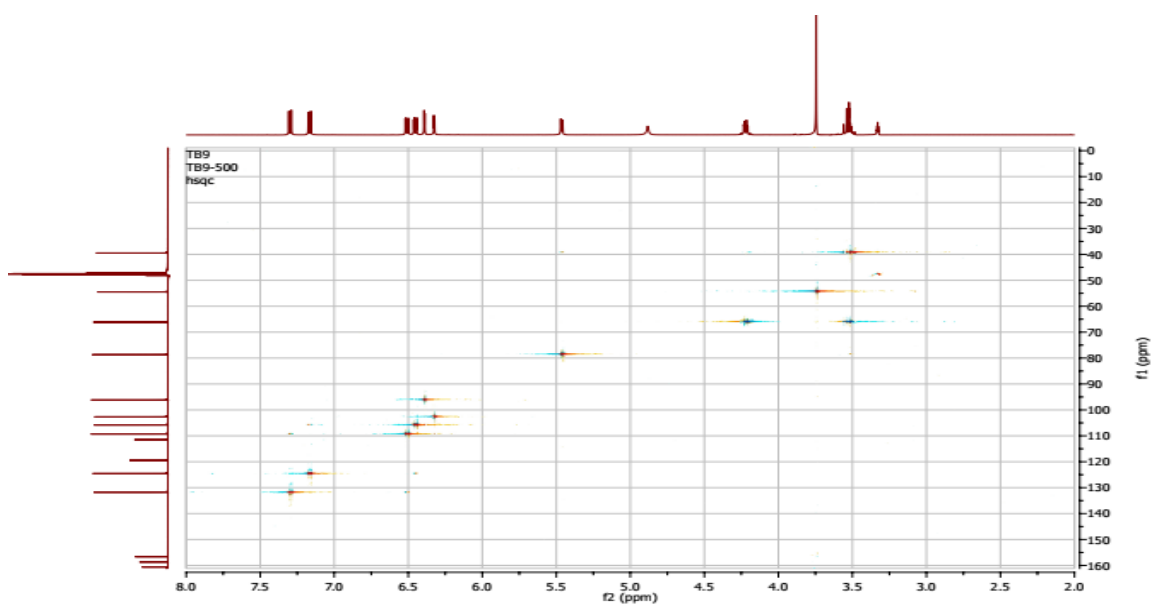

FIGURE S18 : HSQC Spectrum of Compound **5**

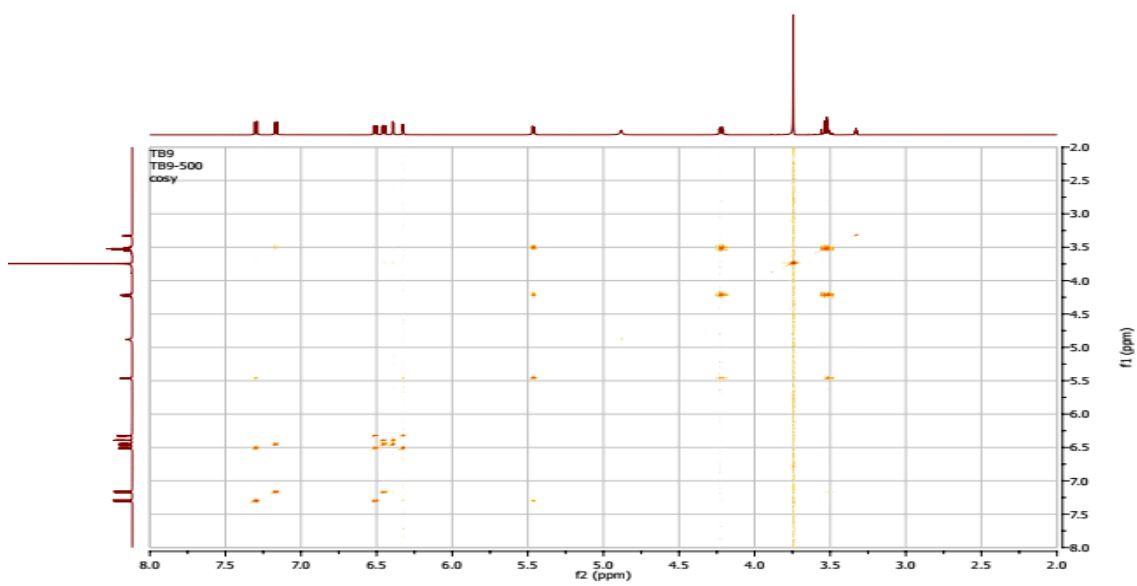

FIGURE S19 :  $^1\text{H}$ - $^1\text{H}$  COSY Spectrum of Compound **5**

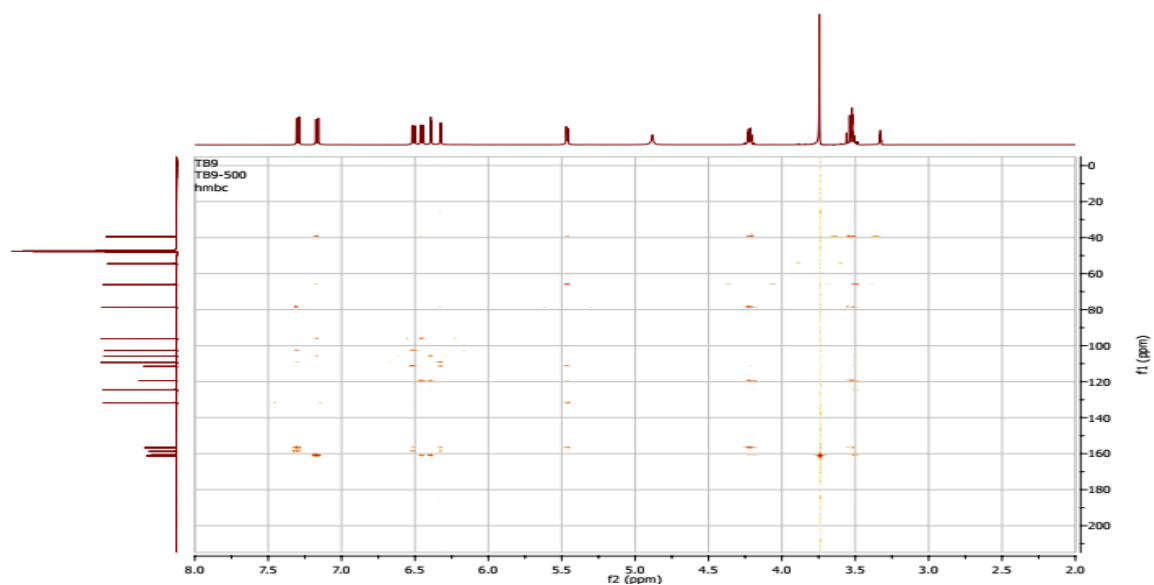

FIGURE S20 : HMBC Spectrum of Compound 5

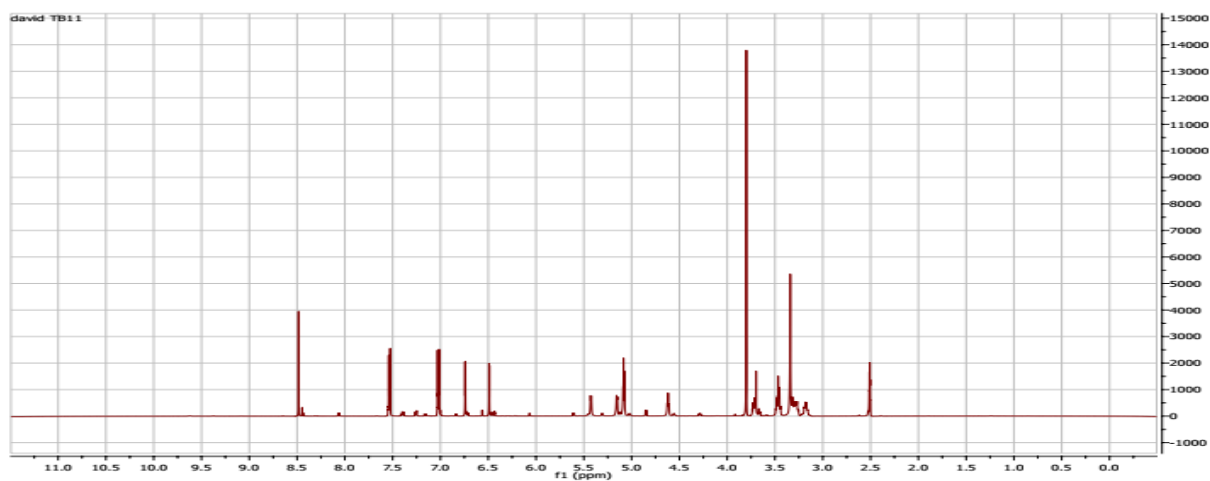

FIGURE S21 :  $^1\text{H}$ -NMR Spectrum

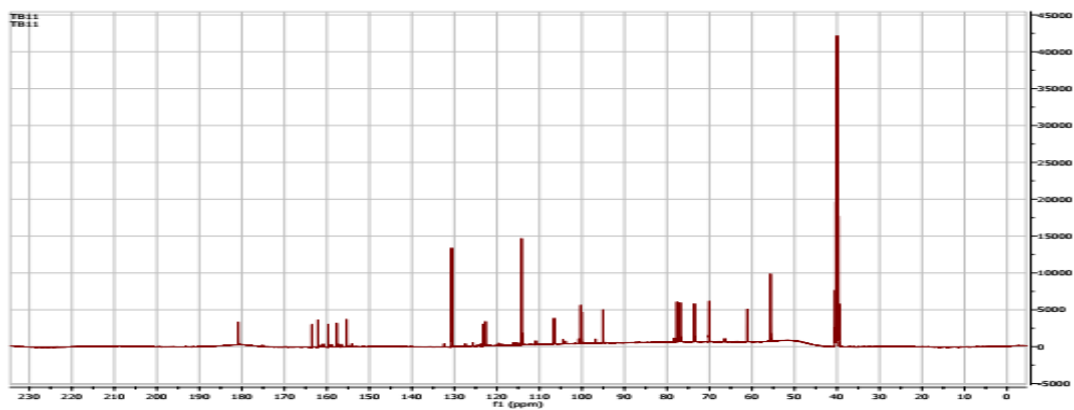

FIGURE S22 :  $^{13}\text{C}$ -NMR Spectrum of Compound 6

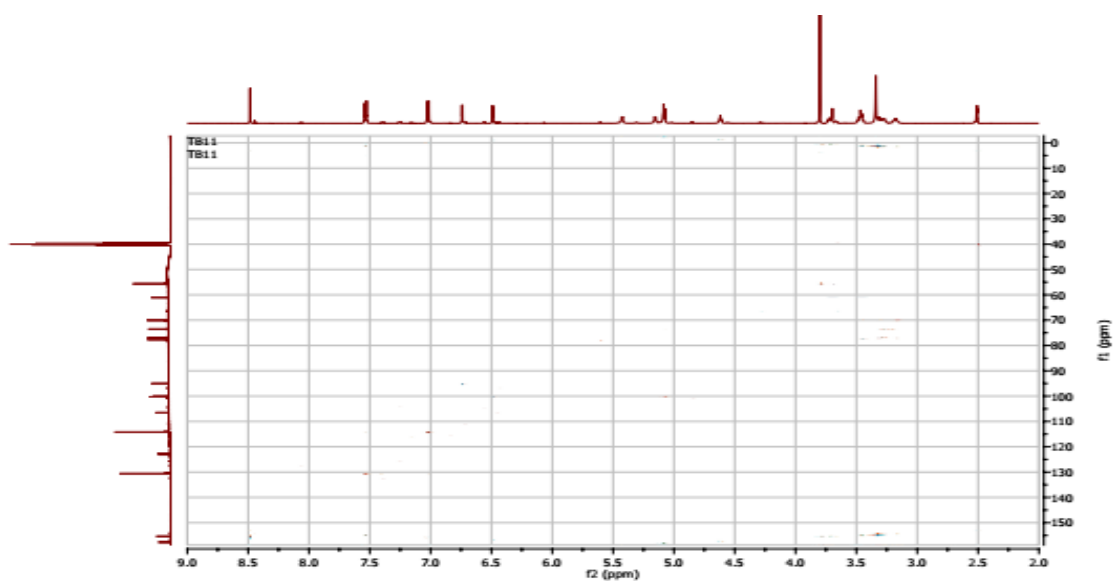

FIGURE S23 : HSQC Spectrum of Compound 6

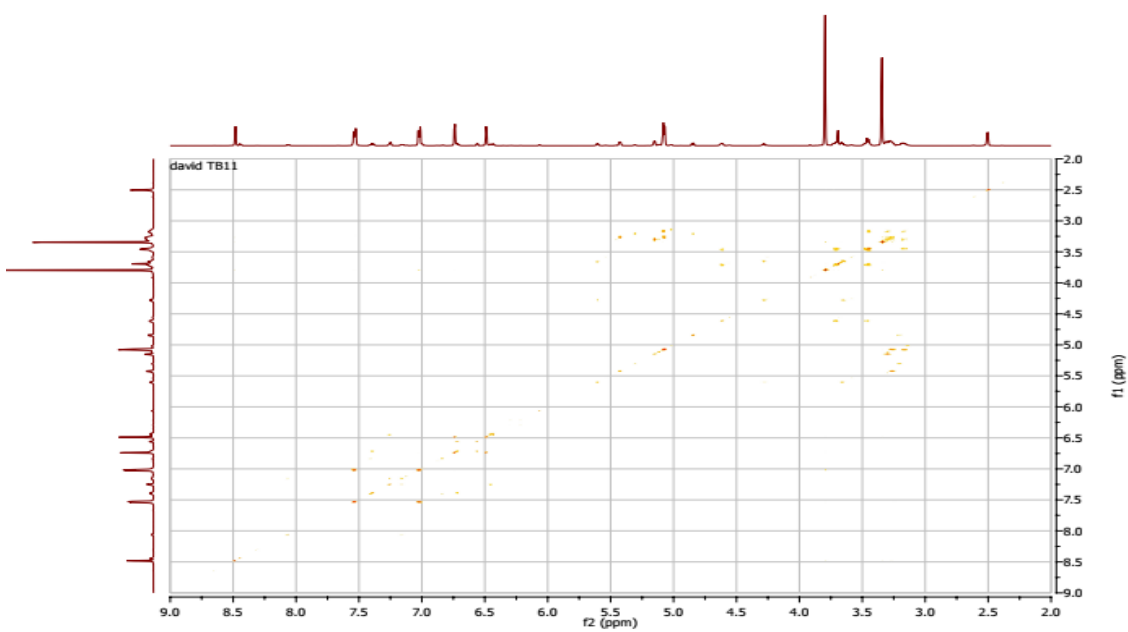

FIGURE S24 :  $^1\text{H}$ - $^1\text{H}$  COSY Spectrum of Compound 6

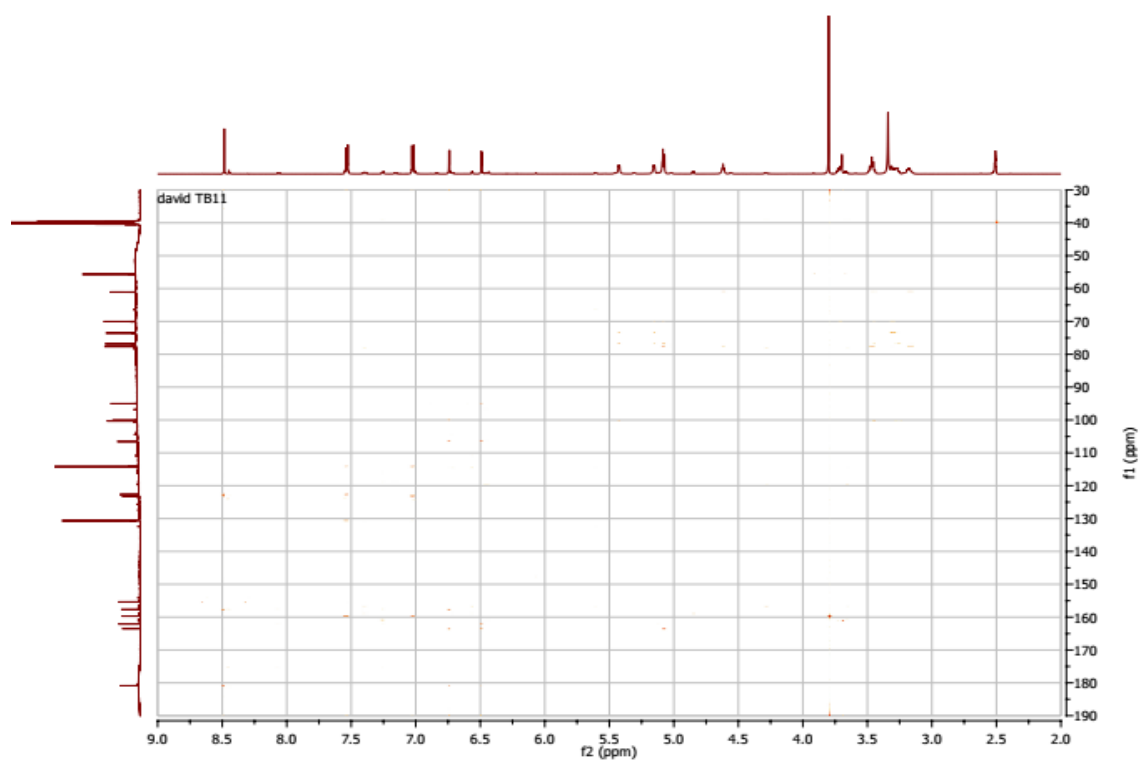

FIGURE S25 : HMBC Spectrum of Compound 6

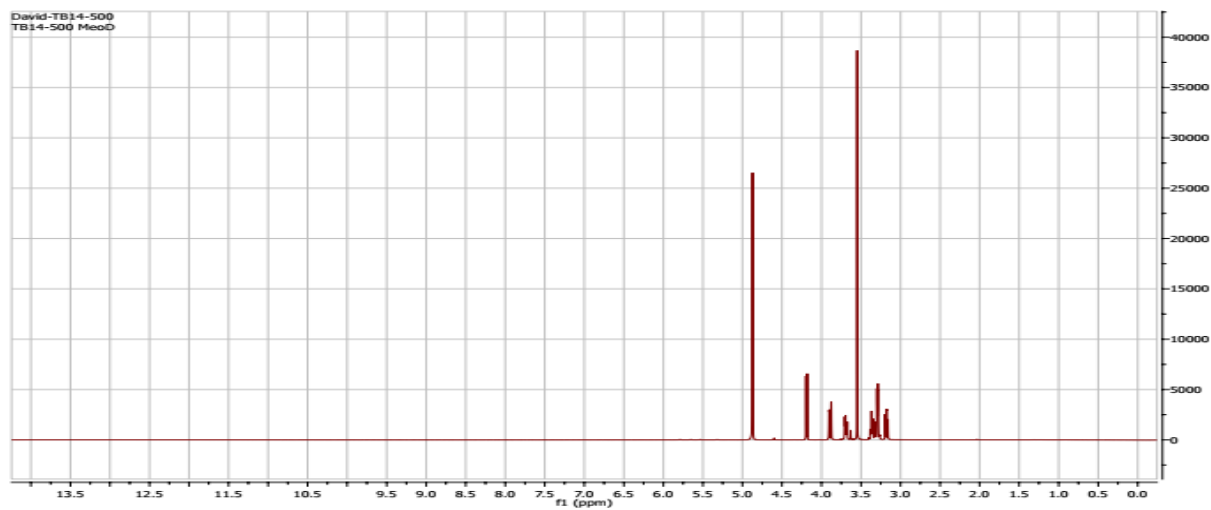

FIGURE S26 : <sup>1</sup>H-NMR Spectrum of Compound 7

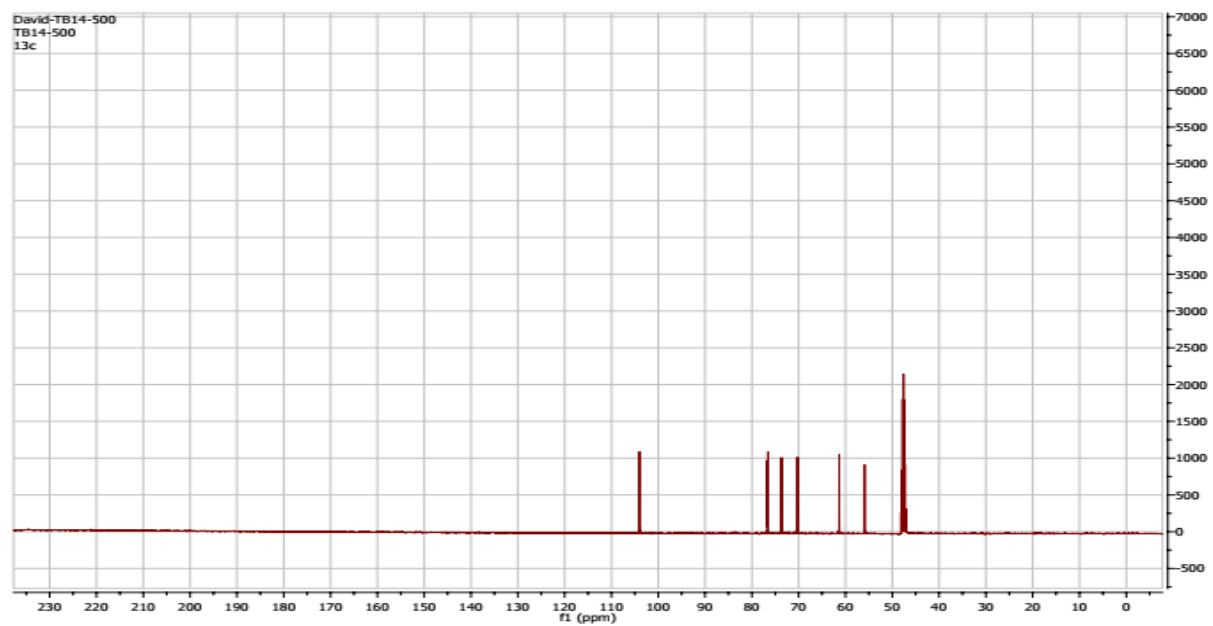

FIGURE S27 :  $^{13}\text{C}$ -NMR Spectrum of Compound 7

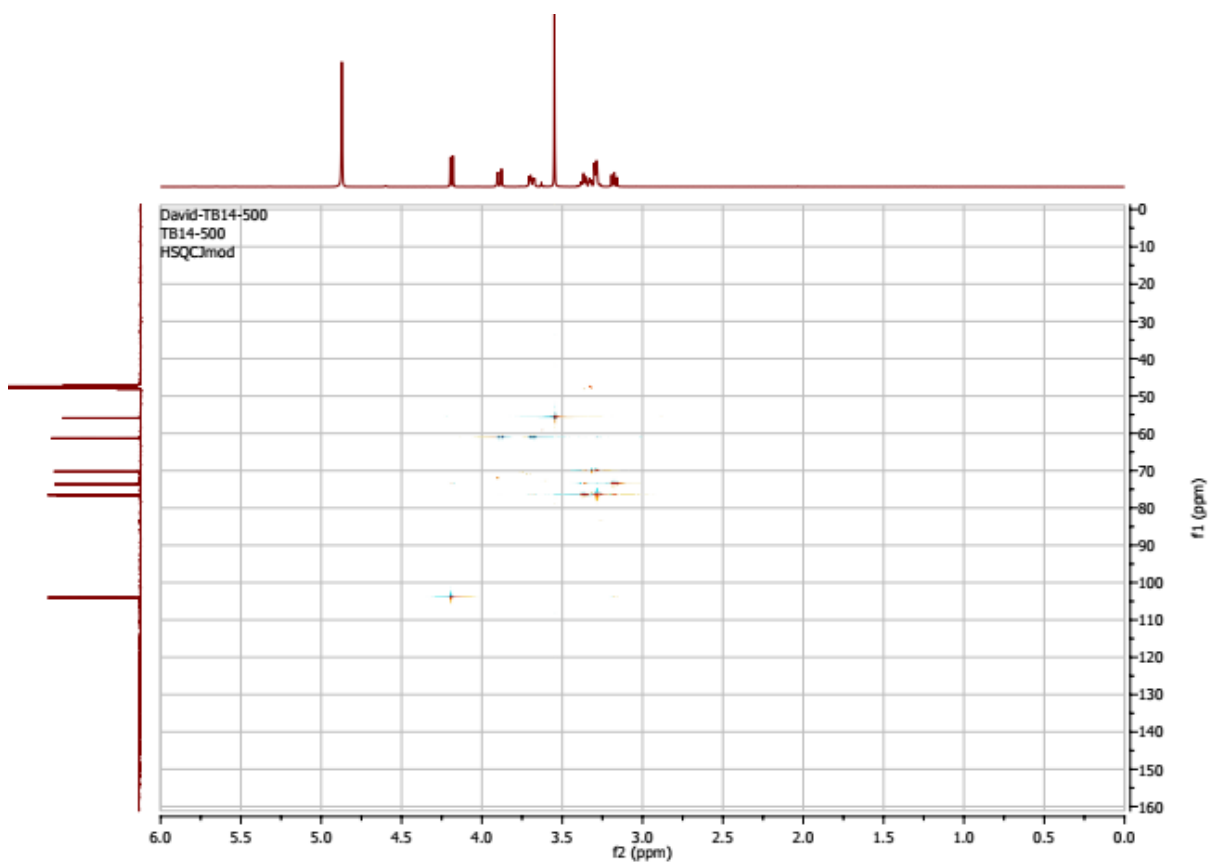

FIGURE S28 : HSQC Spectrum of Compound 7



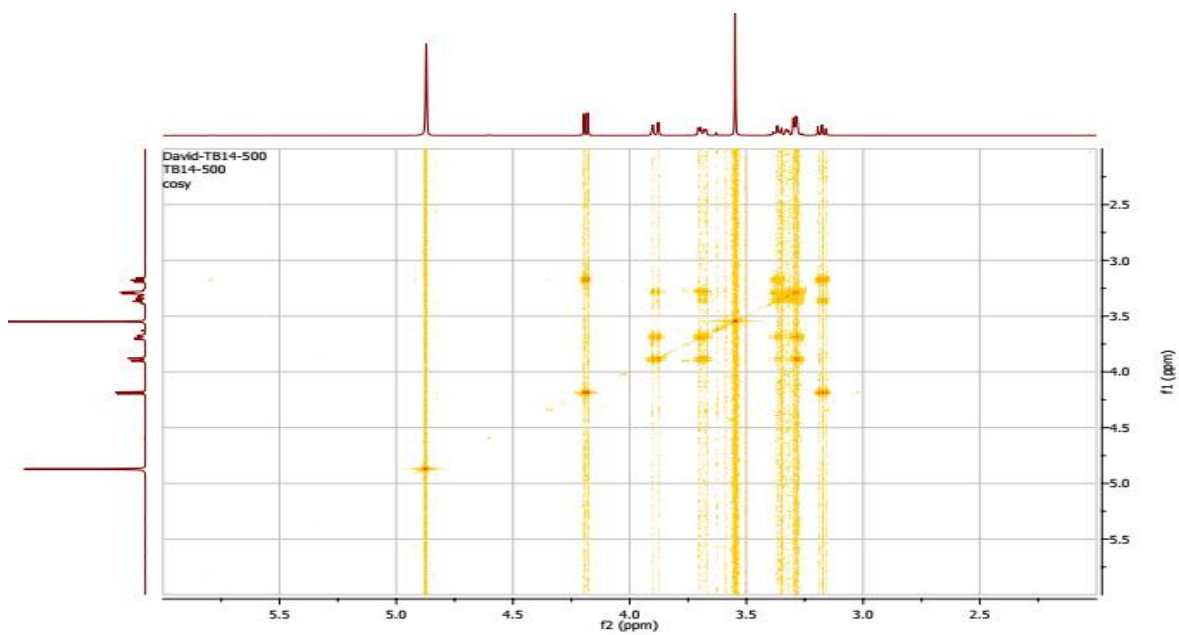

FIGURE S29 :  $^1\text{H}$ - $^1\text{H}$  COSY Spectrum of Compound 7

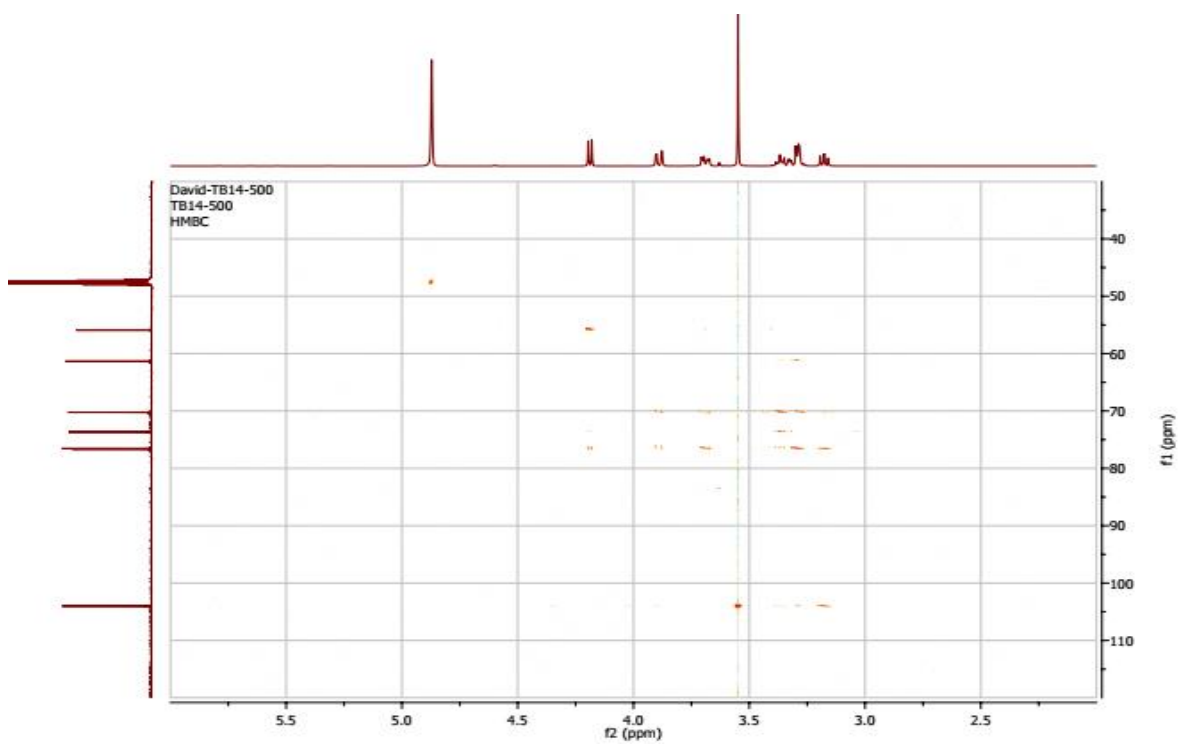

FIGURE S30 : HMBC Spectrum of Compound 7

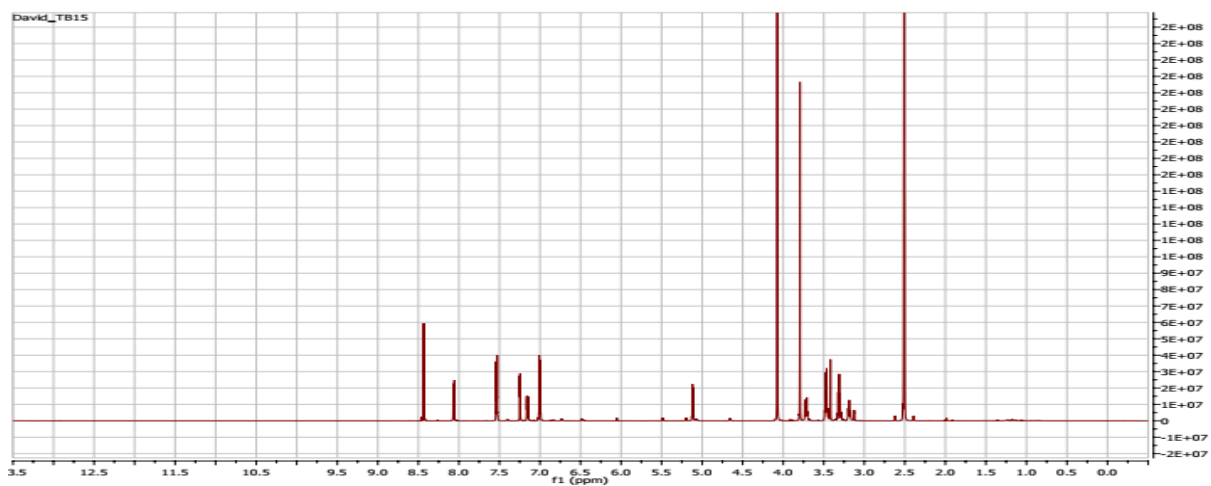

FIGURE S31 :  $^1\text{H-NMR}$  Spectrum of Compound 8

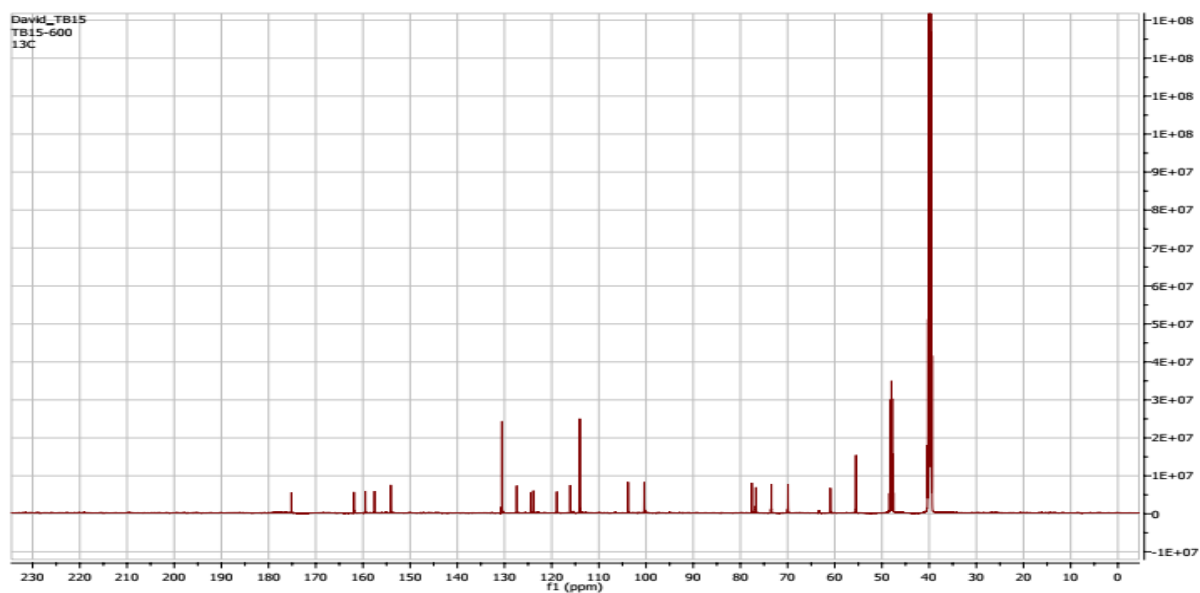

FIGURE S32 :  $^{13}\text{C-NMR}$  Spectrum of Compound 8

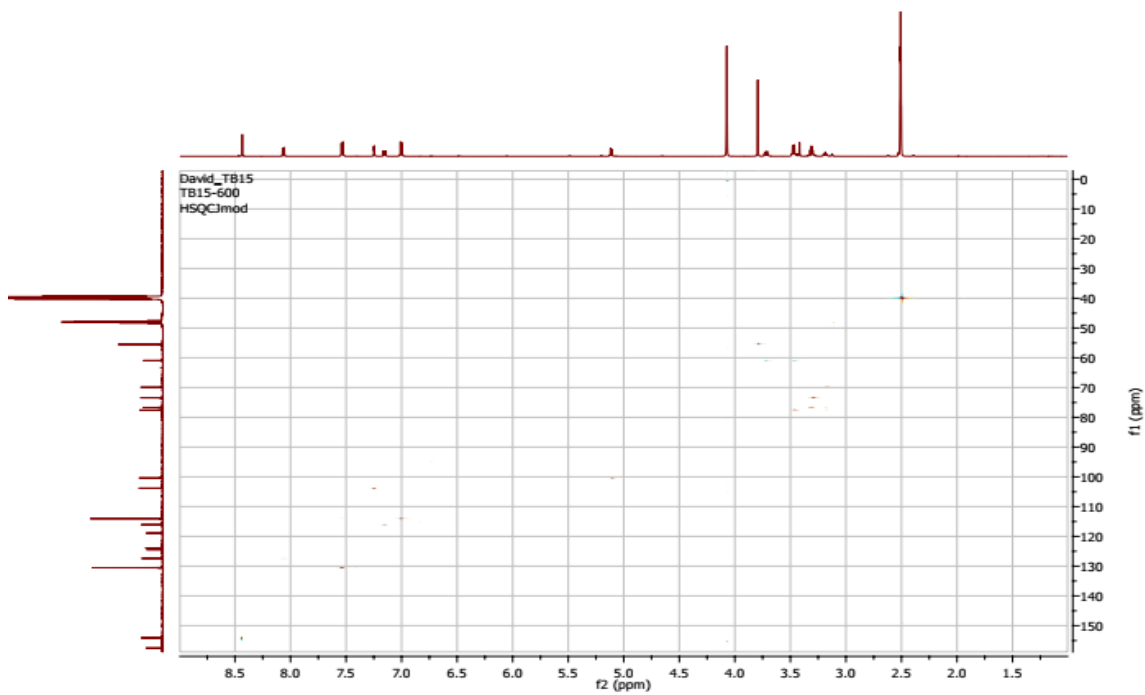

FIGURE S33 : HSQC Spectrum of Compound **8**

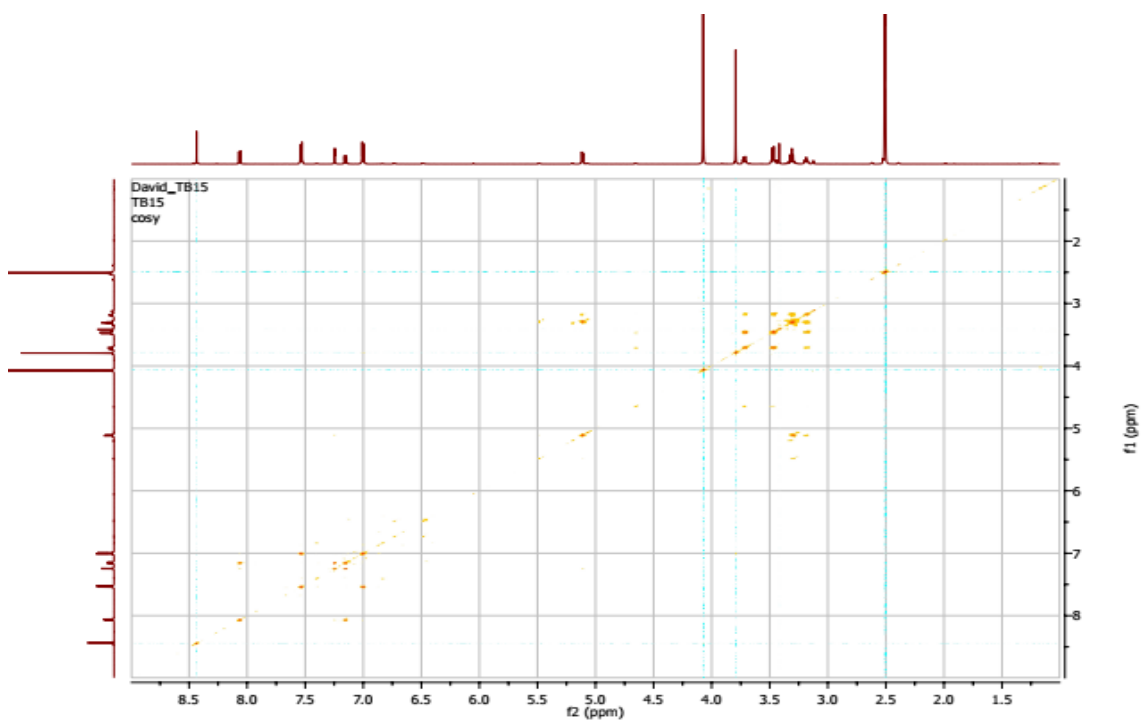

FIGURE S34 :  $^1\text{H}$ - $^1\text{H}$  COSY Spectrum of Compound **8**

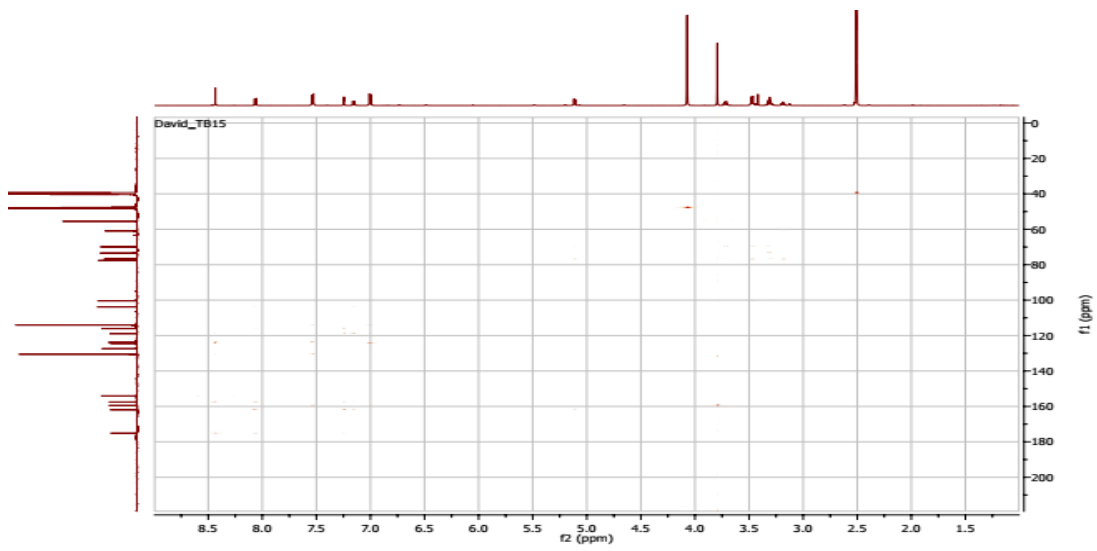

FIGURE S35 : HMBC Spectrum of Compound **8**

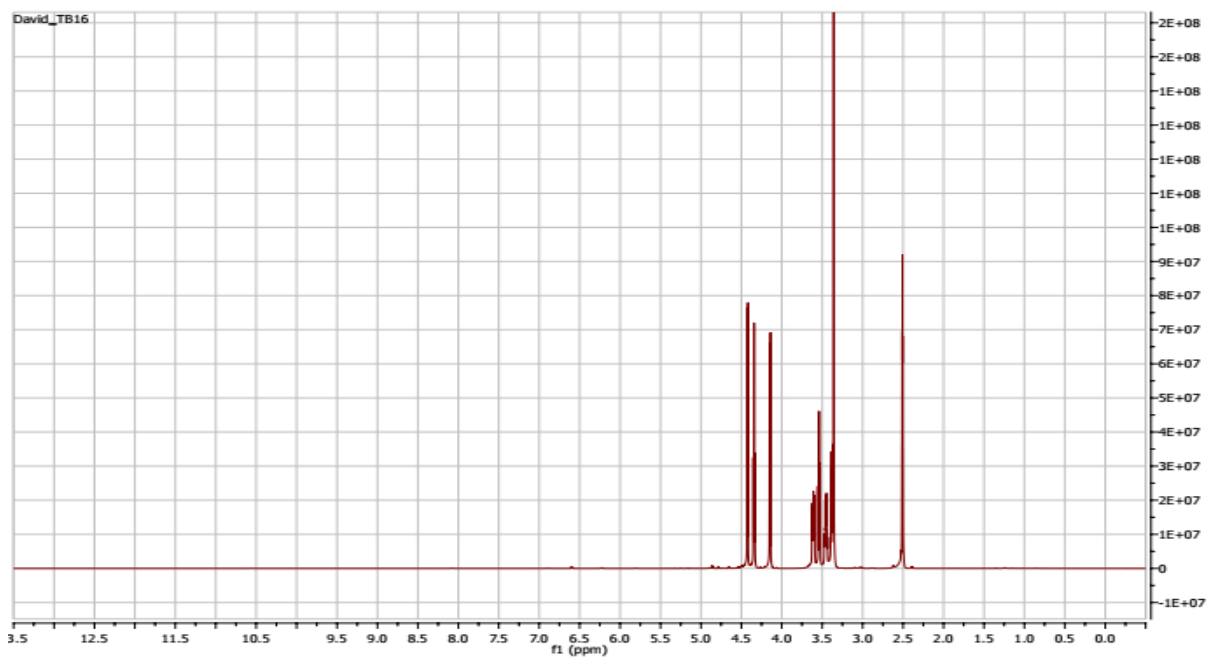

FIGURE S36 :  $^1\text{H}$ -NMR Spectrum of Compound **9**

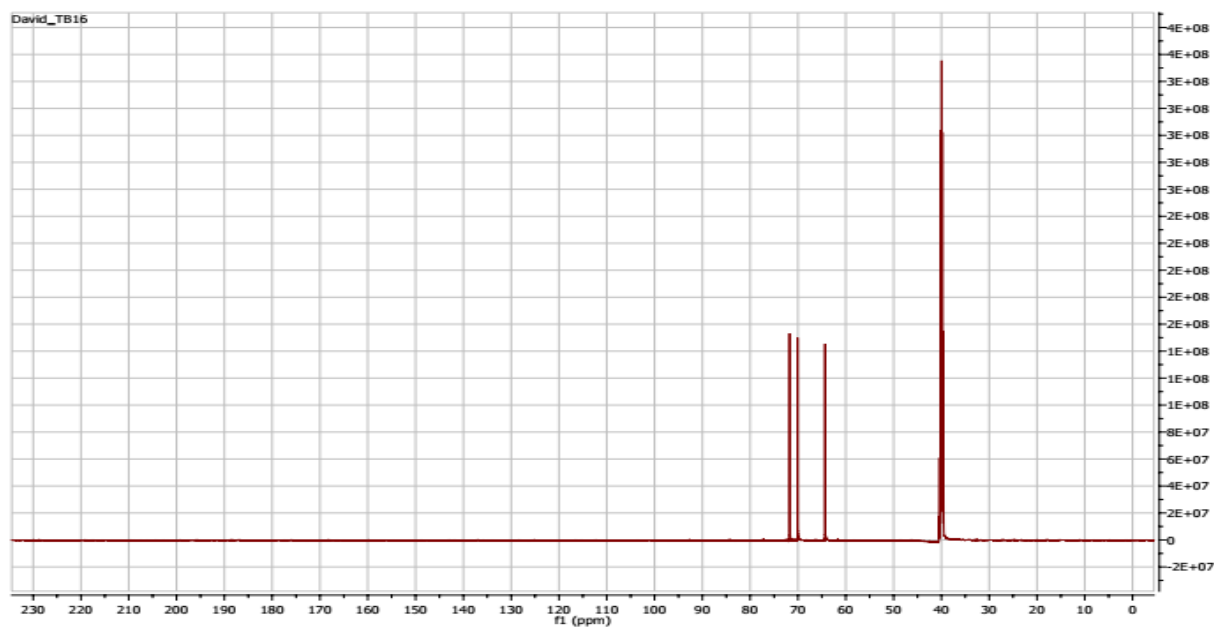

FIGURE S37 :  $^{13}\text{C}$ -NMR Spectrum of Compound 9

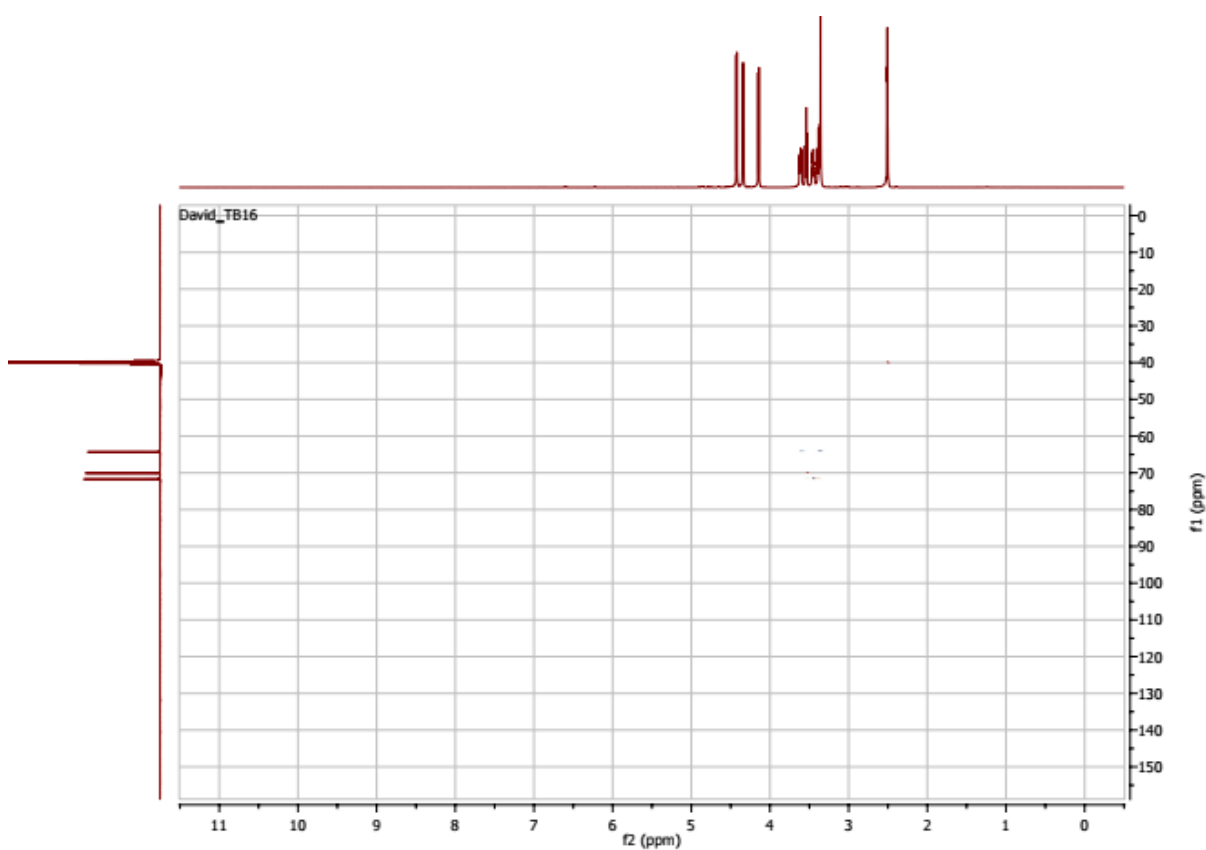

FIGURE S38 : HSQC Spectrum of Compound 9

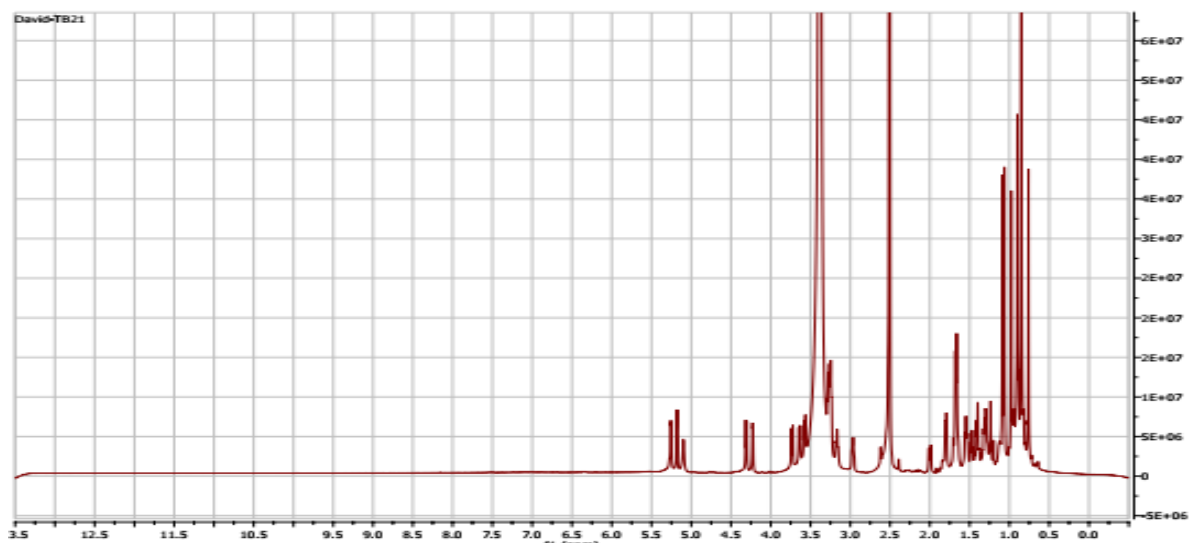

FIGURE S39 :  $^1\text{H}$ -NMR Spectrum of Compound **10**

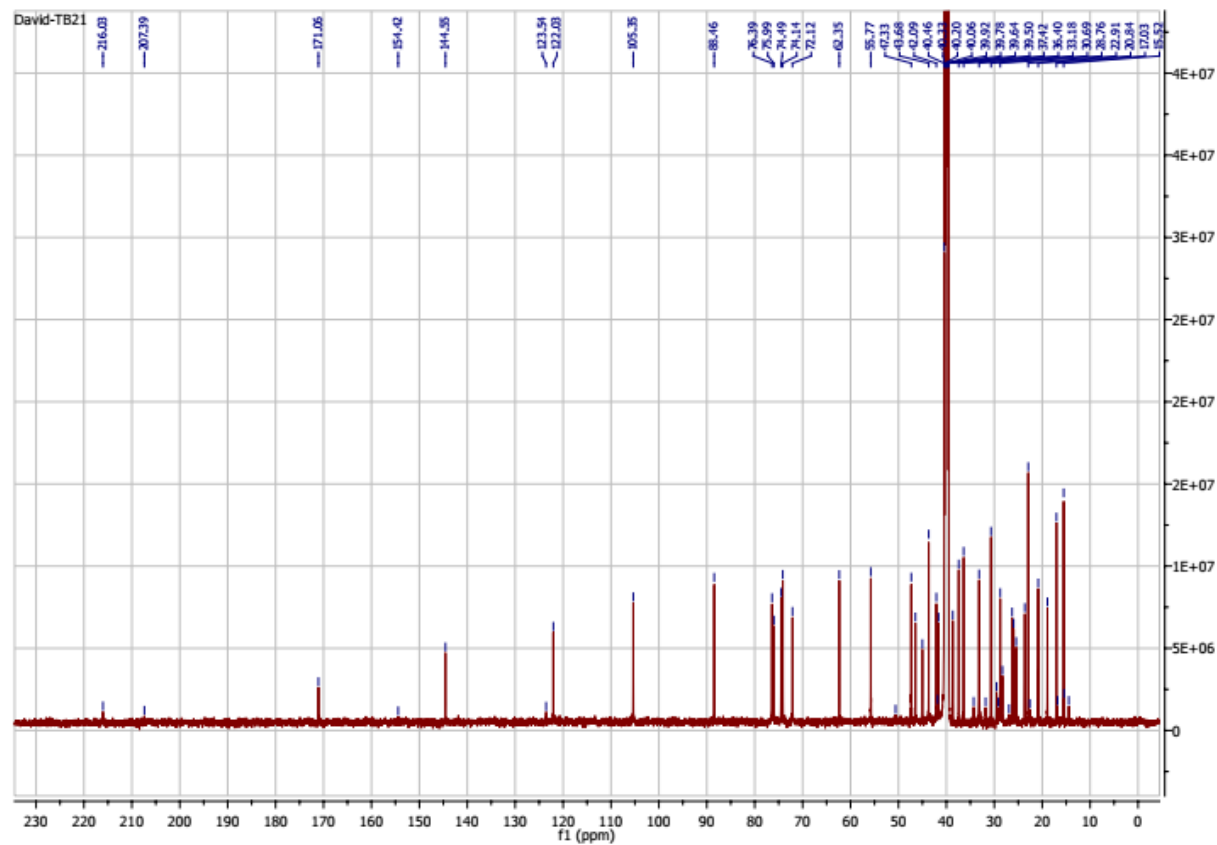

FIGURE S40 :  $^{13}\text{C}$ -NMR Spectrum of Compound **10**

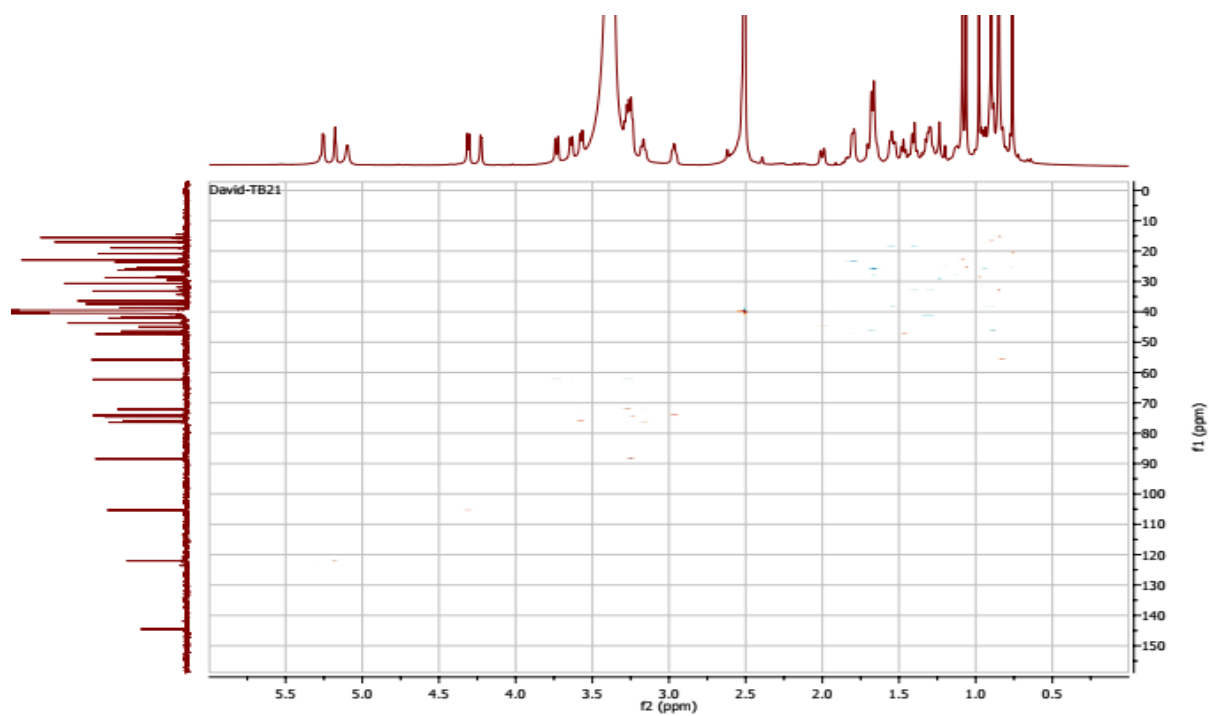

FIGURE S41 : HSQC Spectrum of Compound **10**

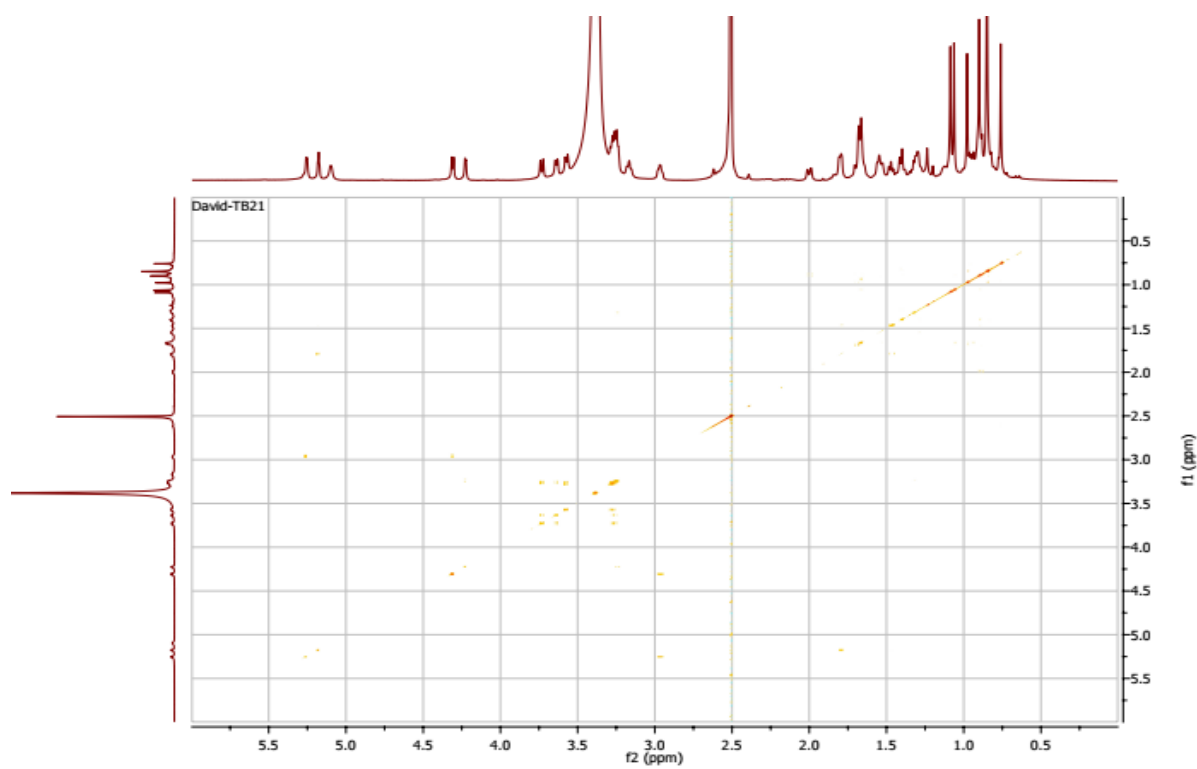

FIGURE S42 :  $^1\text{H}$ - $^1\text{H}$  COSY Spectrum of Compound **10**

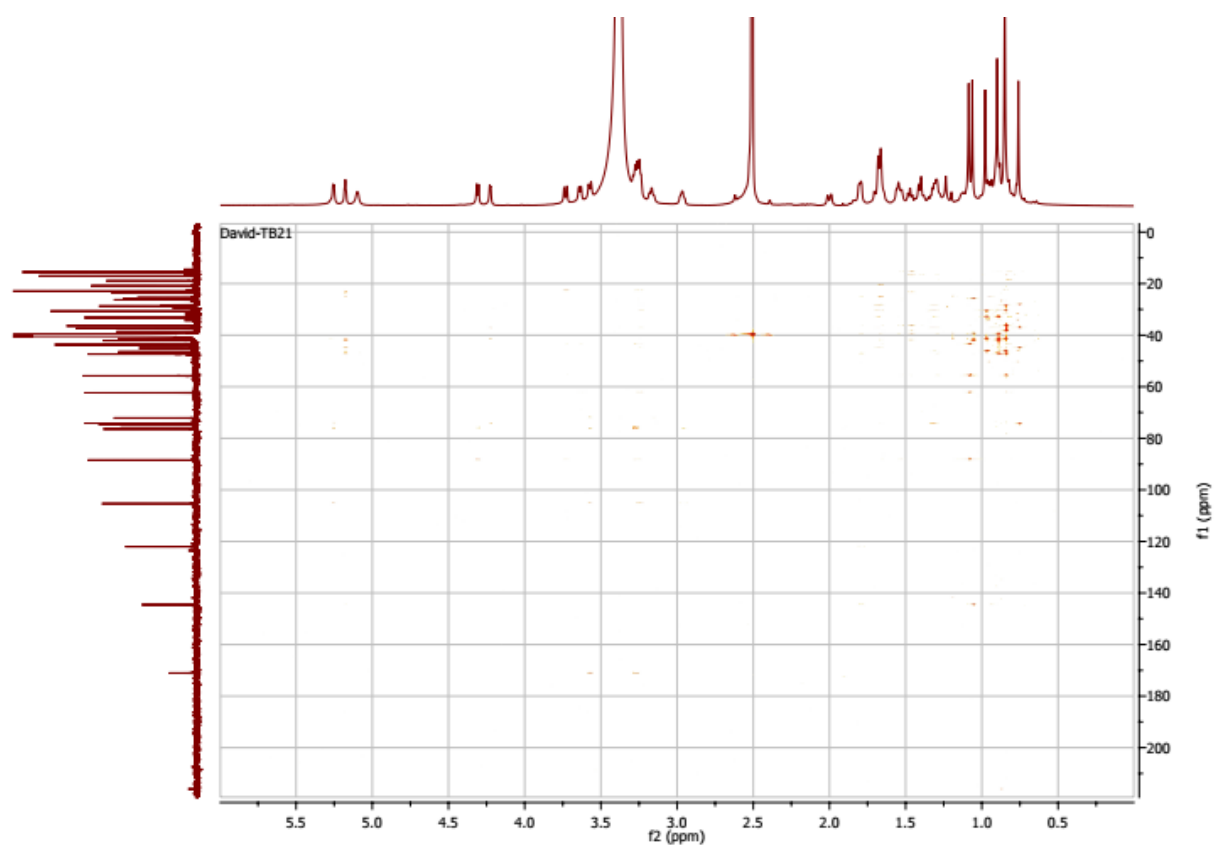

FIGURE S43 : HMBC Spectrum of Compound **10**
